# Supplementary material for: MRI Assessment of Changes in Tumor Vascularization during Neoadjuvant Anti-Angiogenic Treatment in Locally Advanced Breast Cancer Patients
Source: MDPI journal article supplement (doi:10.3390/cancers15184662), 2023-09-21
Supplement: s1 [file s1]

## Supplementary figures

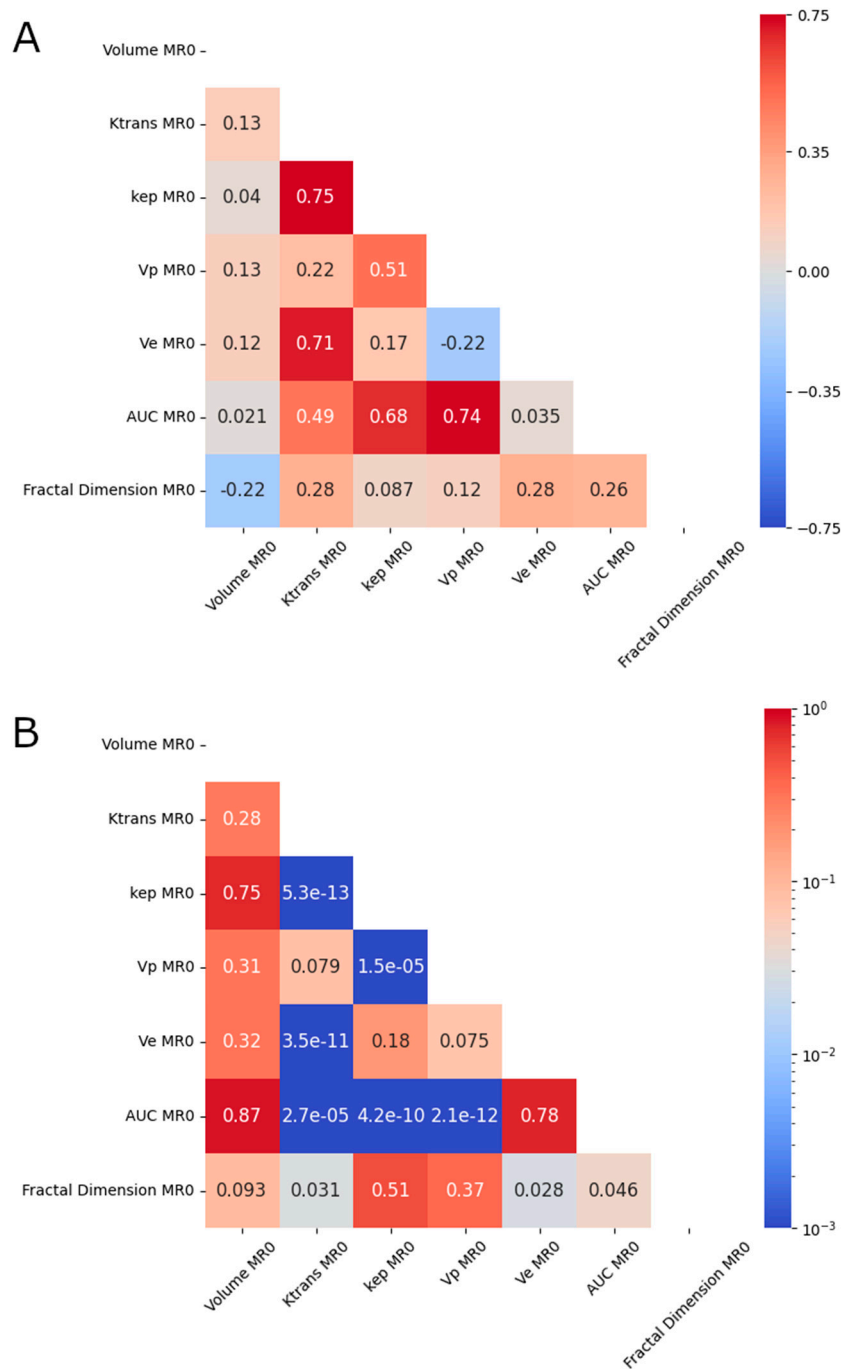

**Supplementary Figure S1:** Pre-treatment correlations between the MRI parameters and tumor volume. Pearson correlation coefficients are shown at the top (A), and p-values are shown at the bottom (B).

## Supplementary table

**Supplementary Table S1:** MRI protocol of the NeoAva study.

| Acquisition parameters        | TSE T2W     | TSE T1W     | T1W GRE*   | 3D SPGR DCE | DW SE single-shot EPI |
|-------------------------------|-------------|-------------|------------|-------------|-----------------------|
| Plane                         | Transversal | Sagittal    | Tranversal | Transversal | Transversal           |
| Echo time [ms]                | 80          | 9.4         | 1.21       | 2.59        | 69                    |
| Repetition time [ms]          | 4570        | 666         | 4.0        | 5.46        | 5200                  |
| Field of view [mm]            | 340 x 340   | 220 x 220   | 320 x 320  | 320 x 320   | 360 x 185             |
| Pixel size [mm]               | 0.66 x 0.66 | 0.86 x 0.86 | 1.0 x 1.0  | 1.0 x 1.0   | 2.57 x 2.57           |
| Slice thickness [mm]          | 3           | 4           | 1.5        | 1.5         | 4.5                   |
| Number of excitations         | 1           | 1           | 1          | 1           | 6                     |
| Temporal resolution [s]       |             |             |            | 13          |                       |
| b-values [s/mm <sup>2</sup> ] |             |             |            |             | 0, 50, 250, 500, 800  |
| Echo train length             | 17          | 5           |            |             |                       |
| Bandwidth [Hz/px]             | 222         | 219         |            | 460         | 1116                  |

TSE = turbo spin echo, GRE = gradient echo, SPGR = spoiled gradient echo, DCE = dynamic contrast-enhanced, DW = diffusion weighted, SE = spin echo, EPI = echo planar imaging

\*Performed twice for corection of B1 inhomogeneities, once using only the bodycoil, and once using both the bodycoil and the breast-coil
